# Supplementary figures and images for: RepID as a potential biomarker and therapeutic target for lung neuroendocrine tumor
Source: PubMed Central journal article supplement — Sci Rep. 2024 Nov 11;14:27487. doi: 10.1038/s41598-024-79104-9 (PMC11551140; doi:10.1038/s41598-024-79104-9), 2024-11-11

# Supplementary Figure 1

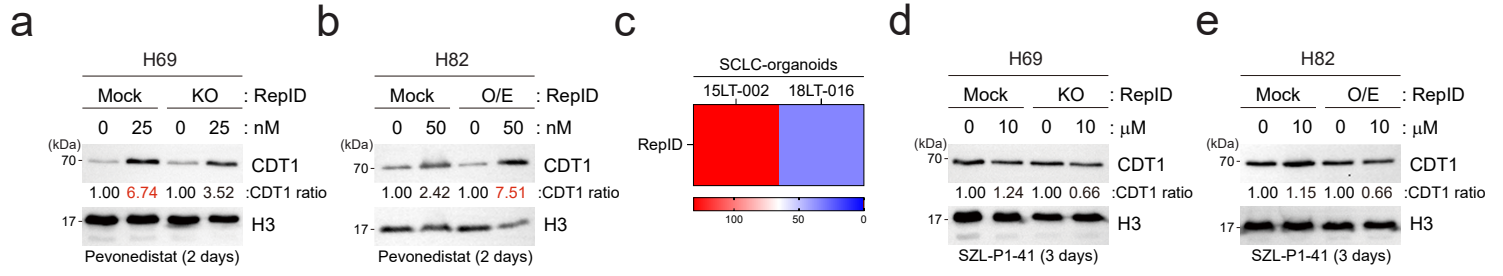

# Supplementary Figure 2

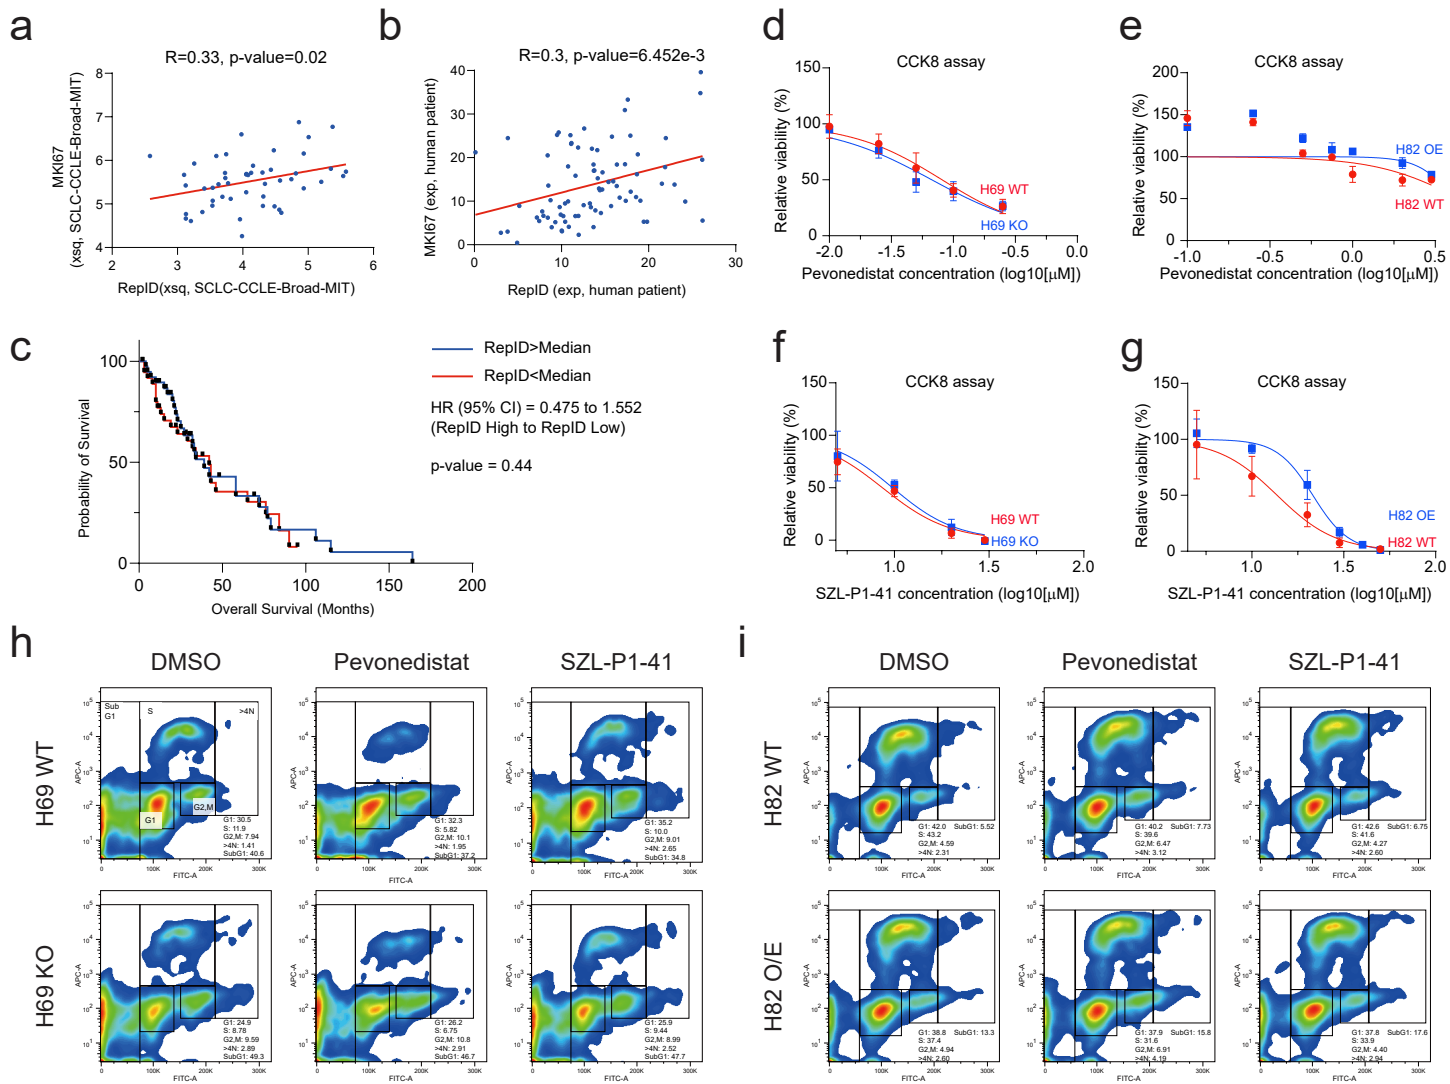

Supplement: 41598_2024_79104_MOESM1_ESM.pdf [file 41598_2024_79104_MOESM1_ESM.pdf]

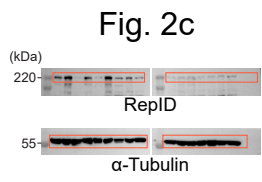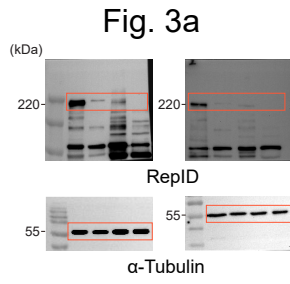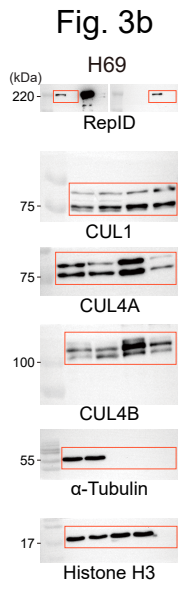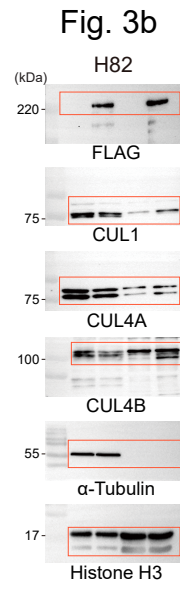

**Supplementary Fig. 1a**

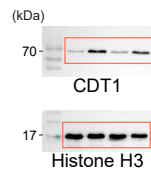

**Supplementary Fig. 1b**

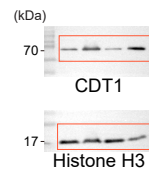

**Supplementary Fig. 1d**

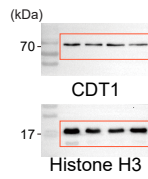

**Supplementary Fig. 1e**

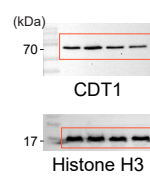

Supplement: 41598_2024_79104_MOESM3_ESM.pdf [file 41598_2024_79104_MOESM3_ESM.pdf]
